# Development of a novel preclinical glioblastoma mouse model and therapeutic impact of IRE1 inhibition

Pierre Jean Le Reste<sup>1,2,3,4,11</sup>, Raphael Pineau<sup>1,2,3,11</sup>, Juhi Samal<sup>5</sup>, Gwénaële Jégou<sup>1,2,3</sup>, Stéphanie Lhomond<sup>5,6</sup>, Adrienne M. Gorman<sup>5,6</sup>, Afshin Samali<sup>6</sup>, John B Patterson<sup>7</sup>, Qingping Zeng<sup>7</sup>, Abhay Pandit<sup>5</sup>, Marc Aubry<sup>3,8,10</sup>, Nicolas Soriano<sup>3,8</sup>, Amandine Etcheverry<sup>9</sup>, Jean Mosser<sup>3,8,9,10</sup>, Tony Avril<sup>1,2,3</sup>, and Eric Chevet<sup>1,2,3,\*</sup>

<sup>1</sup>Inserm U1242, University of Rennes, Rennes, France. <sup>2</sup>Centre de lutte contre le cancer Eugène Marquis, Rennes, France. <sup>3</sup>Rennes Brain Cancer Team (REACT), 35000 Rennes, France. <sup>4</sup>Neurosurgery dept, University Hospital of Rennes, 35000 Rennes, France. <sup>5</sup>CÚRAM, Centre for Research in Medical Devices, National University of Ireland, Galway, Ireland. <sup>6</sup>Apoptosis Research Centre, National University Ireland Galway, Galway, Ireland. <sup>7</sup>Fosun Orinove PharmaTech Inc., 3537 Old Conejo Road, Suite 104, Newbury Park, CA, 91320, USA. <sup>8</sup>University of Rennes, CNRS, IGDR [(Institut de génétique et développement de Rennes)]-UMR 6290, F-35000 Rennes, France. <sup>9</sup>CHU Rennes, Service de Génétique Moléculaire et Génomique Médicale, Rennes, France. <sup>10</sup>University of Rennes, Plateforme GEH, CNRS, Inserm, BIOSIT - UMS 3480, US\_S 018, F-35000 Rennes, France.

<sup>11</sup>equal contribution

\*Correspondence to EC: InsermU1242, Centre de lutte contre le cancer Eugène Marquis, Avenue de la Bataille Flandres Dunkerque, 35042 Rennes, France. Email : [eric.chevet@inserm.fr](mailto:eric.chevet@inserm.fr)

## **Abstract**

Glioblastoma multiforme (GBM) is the most severe primary brain cancer. Despite an aggressive treatment comprising surgical resection and radio/chemotherapy patient's survival post diagnosis remains short. A limitation for success in finding novel improved therapeutic options for such dismal disease partly lies in the lack of a relevant animal model that accurately recapitulates patient disease and standard of care. In the present study, we have developed a novel immunocompetent GBM model that includes tumor surgery and a radio/chemotherapy regimen resembling the Stupp protocol and we have used this model to test the impact of the pharmacological inhibition of the endoplasmic reticulum (ER) stress sensor IRE1, on treatment efficacy.

## Introduction

Glioblastoma multiforme (GBM) is the most severe primary brain cancer and represents more than 15% of all brain tumors. Despite an aggressive treatment comprising surgical resection and a combination of irradiation and chemotherapy (“Stupp protocol”), patient’s survival post-diagnosis remains short with a median overall survival of 15 months [1]. The lack of efficacy of the current treatments is mostly due to the intratumor heterogeneity at diagnosis with the presence of multiple driver alterations [2], as well as to different tumor cell types that exhibit various sensitivity to anti-cancer agents. Finally, it is also due to the diffuse nature of GBM tumors that makes complete resection difficult. Another limitation for the discovery of new improved therapeutic approaches is the lack of a relevant animal model that extensively recapitulates current GBM patient disease and standard of care.

In the past couple of years, we have demonstrated that the Unfolded Protein Response (UPR) plays an instrumental role in GBM development [3-8]. More precisely, we have shown that IRE1, the most conserved UPR sensor, signals in tumor cells to remodel the tumor microenvironment to favor tumor growth and most likely to alter the response to treatment. We demonstrated that the IRE1/XBP1s (spliced XBP1) axis exhibits pro-oncogenic properties whereas Regulated IRE1 Dependent Decay of RNA (RIDD) dampens tumor angiogenesis and tumor cell migration/invasion. This observation was then used to stratify GBM patients, and we showed that survival of patients with tumors exhibiting high XBP1s and low RIDD was significantly reduced compared to that of patients with low XBP1s and high RIDD tumors [8]. These observations point toward the IRE1/XBP1s axis as a potentially relevant therapeutic target which, when inhibited in XBP1s high tumors would i) slow down tumor growth by impairing the pro-tumoral remodeling of the tumor stroma and ii) sensitize tumor cells to the current treatments [8].

To further test the potential impact of the pharmacological targeting of IRE1/XBP1, we propose to use an IRE1 RNase inhibitor, MKC8866 [9] which has been shown to be effective in other cancer models [10], in preclinical models of GBM. However, the current preclinical GBM models, poorly recapitulate the clinical handling of GBM patients and therefore would not be appropriate to test the therapeutic potential of IRE1 inhibition. In the present study, we developed a novel immunocompetent GBM model that involved tumor surgery and a radio/chemotherapy regimen resembling the Stupp protocol and we

used this unique model to test the therapeutic relevance of IRE1 inhibition on tumor microenvironment and on treatment efficacy.

## Materials and methods

*Reagents* - All reagents were purchased from Sigma-Aldrich (*St Quentin Fallavier, France*), unless otherwise stated. For immunohistochemistry staining, primary antibodies against vimentin (rabbit monoclonal, used at 1 in 250 dilution) was obtained from Abcam (*Paris, France*); CD31 (rabbit polyclonal, used at 1 in 50 dilution) from Bioss Inc. (*Cliniscience, Nanterre, France*); and against IBA-1 (rabbit polyclonal, used at 1 in 50 dilution) from Wako (*Sobioda, Montbonnot, France*). For Western blot experiments, primary antibodies against ATF4 and phospho-eIF2alpha were purchased from Cell Signaling Technology (*Ozyme, St Quentin-en-Yvelines, France*), anti-Calnexin (CNX) antibodies were a kind gift from JJM Bergeron (McGill University, Montreal, Qc, Canada).

*Cell lines* - The GL261 murine glioblastoma cell line was a kind gift from Dr Clavreul (University of Angers, France). These cells were transfected with the plasmid pGL4-Luc and the luciferase-expressing cells stably selected using G418 (the selected line was polyclonal and renamed GL261-Luc). The cells were cultured in Dulbecco's Modified Eagle Medium (DMEM, *Life Technologies, Thermo Fisher Scientific, Courtaboeuf, France*) with the addition of 10% FBS (*Thermo Fisher Scientific*), and 100 µg/ml of G418 (*Thermo Fisher Scientific*). The cells were grown in a humidified incubator at 37°C with 5% CO<sub>2</sub>. The human U251 GBM cells were grown in DMEM containing 10% FBS.

*Genome analyses* - Whole Genome Sequencing of the GL261 cell line was performed Integragen (<https://www.integragen.com/fr/>). PCR free Libraries were prepared with NEBNext Ultra II DNA Library Prep Kit according to the supplier recommendations. Briefly the key stages of this protocol comprises a specific double strand gDNA quantification, a fragmentation (300 ng of input High molecular weight gDNA) using sonication method to obtain approximately 400 bp medium pieces, and finally, paired-end adaptor oligonucleotides (xGen TS-LT Adapter Duplexes from IDT) are ligated on repaired A tailed fragments then purified for direct sequencing without PCR step. DNA PCR free library was sequenced on Paired End 150 bp run on the Illumina HiSeq4000. Image analysis and base calling were performed using Illumina Real Time Analysis (RTA) Pipeline version 2.7.7 with default parameters. Sequence reads were mapped to the mouse genome build (mm10) by using the Burrows-Wheeler Aligner (BWA) tool. The coverage was 25X for 75% of the mouse

genome with a mean depth of 33X. The duplicated reads (e.g. paired-end reads in which the insert DNA molecule showed identical start and end locations in the mouse genome) were removed (samtools). Variant calling, allowing the identification of genetic alterations as well as SNV (Single Nucleotide Variation) small insertions/deletions (up to 20 bp) was performed via the Broad Institute's GATK Haplotype Caller GVCF tool (3.7) for constitutional DNA. Finally, an in-house post-processing to filter out candidate germline mutations that are more consistent with artifacts was applied (Mapping Quality, Base Quality, Strand Bias, Variant Quality). Ensembl VEP (Variant Effect Predictor, release 87) program processed variants for further annotation. This tool annotates variants, determines the effect on relevant transcripts and proteins, and predicts the functional consequences of variants. It takes into account data available in dbSNP (dbSNP146). Other information like quality score, homozygote/heterozygote status, count of variant allele reads were also reported. We detected copy-number variants and allelic imbalances in GL261 using the Control-FREEC algorithm (FREEC-11.5) with the C57BL\_6.bam file downloaded from the SANGER FTP server ([ftp://ftp-mouse.sanger.ac.uk/current\\_bams/](ftp://ftp-mouse.sanger.ac.uk/current_bams/)) as a non-tumor reference sample.

*Cell culture and treatments* - For survival assays, GL261 cells were cultured in 96-well plates at 5,000 cells/well in the presence of increasing amounts of temozolomide (TMZ) (0 to 1000  $\mu$ M), MKC8866 (0 to 200  $\mu$ M) with two treatments of radiation at 5 Gy (at day 1 and day 3). After 5 days (for TMZ) or 6 days (for MKC8866) of culture, 20  $\mu$ l of the WST1 reagent were added to each well. After 4 hours at 37°C, optical densities (OD) were analyzed using spectrophotometry at 450 nm and 595 nm. Specific OD were given by the difference between the OD observed at 450 nm and the OD at 595 nm. Cell viability was calculated by the ratio of the specific OD observed with cells incubated in the presence of different concentration of TMZ and the specific OD observed with cells cultured in medium alone, this information allowed us to determine IC50 values using Prism software (GraphPad). Each experimental point represents at least a triplicate. For protein and RNA extractions, GL261 cells were seeded at a density of  $10^6$  cells per dish (6 cm diameter), with two dishes per time point. Cells were treated as described above for 2, 4, 8 and 24 hours. Each experimental point represents at least a triplicate. For protein extraction, cells were lysed using 100  $\mu$ l of lysis buffer (30 mM Tris-HCl, pH 7.5, 150 mM NaCl, 1.5% CHAPS and Complete™) per plate. Clarified lysates were complemented with 20  $\mu$ l of 5 times reducing Laemmli sample buffer

prior heat-denaturation and used in Western blot experiments with the indicated antibodies (at 1/1000 dilutions). For RNA preparation, cells were lysed using 1ml of Trizol reagent per plate and RNA was extracted according to the manufacturer's instructions (*Thermo Fisher Scientific*) and PCR analyses performed using previously described protocols [11].

*Tumor cell orthotopic implantation* - Tumor cells (GL261-Luc) were implanted into the brain of immunocompetent C57BL/6rJ, 8 weeks old male mice (*Janvier, Laval, France*). All animal procedures met the European Community Directive guidelines (Agreement B35-238-40 Biosit Rennes, France/ No DIR 13480) and were approved by the local ethics committee and ensuring the breeding and the daily monitoring of the animals in the best conditions of well-being according to the law and the rule of 3R (Reduce-Refine-Replace). GL261-Luc cells were implanted in the mouse brain by intracerebral injection followed by tumor growth monitoring using bioluminescence. The mice were anesthetized intraperitoneally (i.p.) and then fixed on a stereotactic frame. This framework makes it possible to manipulate the brains of living animals, and to reach isolated areas of the brain precisely relative to markings visible to the naked eye through the use of three-dimensional coordinates. After incising the scalp, the stereotaxic coordinates were calculated for injection of tumor cells into a specific point of the brain, and reproducible for all the mice used. In the study, the tumor cells ( $2.5 \times 10^4$  cells per mice in 1  $\mu$ L) were injected at 2.2 mm to the left of the bregma and 3.2 mm deep to perform the implantation at the level of the striatum.

*Bioluminescence* - Mice were assessed with *in vivo* bioluminescence imaging every 3 days, for the first week, and weekly onward for tumor progression and followed for signs of neurologic deterioration daily. Mice were injected i.p. with 100  $\mu$ l of luciferin (*Promega, Charbonnières-les-Bains, France*). The luciferin was allowed to circulate for 10 min before the mice were anesthetized with a mix of O<sub>2</sub> and isoflurane (2.5%). Mice that showed an increase in tumor burden based on imaging during the first week after tumor implantation were included in the study. Bioluminescence analysis was used to determine the window of resection (day 14).

*Resection* - The mice were anesthetized by the intraperitoneal route with 90  $\mu$ l of anesthetic (1.5 mg/kg of ketamine and 150  $\mu$ g/kg of xylazine). Then they were attached to the

stereotaxic frame and the skin of the skull is incised to expose the convexity of the skull and the injection point. The opening of the bone was performed with small thin forceps allowing minimal craniectomy. Visualization of the tumor was enhanced by using an injection of intravenous fluorescein at the beginning of the procedure. Thanks to a UV source, this fluorophore makes possible to visualize the zones of rupture of blood-brain barrier characteristic of glioblastoma. This visual aid makes it possible to delineate the tumor borders and thus minimizes the lesions on healthy parenchyma. The resection was performed using a surgical microscope, and the tumor was aspirated with the help of a small suction. The extent of resection was mainly driven by the depth of the tumor. Once the resection was performed, the hole left by the tumor was filled with a fibrin-collagen gel containing the inhibitor of interest. The craniectomy was closed with the help of a teflon patch slid (Neuropatch®) under the skull, fixed by the application of biocompatible acrylic glue. This step allows maintenance of intracranial pressure and prevents tumors from developing in the subcutaneous space. Finally, the skin was sewn with non-resorbable sutures at the end of the procedure (see **Movie S1**).

*Stupp-like treatment applied to mice* - Three days after the resection, we proceeded to apply the Stupp protocol, consisting in three steps: (1) irradiation: the objective of radiotherapy is to deliver a dose of ionizing radiation sufficient to ensure tumor control and to prevent cancer recurrence. The effectiveness of anti-tumor treatment is based on a compromise between the quality of tumor control and damage to healthy tissue, it is the benefit/risk balance [12]. Mice were anesthetized, and placed in a lead dome to cover the entire animal to prevent ionizing radiation from reaching the healthy tissues of the animals. A hole of a few centimeters was made in the lead dome, corresponding to the resection area of the tumor, in order to irradiate only the area of interest and protect the rest of the animal. The animals were subjected to a radiation of 5 times 2 Gy 3 days after resection. (2) chemotherapy: five treatments of 50 mg/kg of TMZ in saline were performed over 5 days through intraperitoneal injection. (3) radio/chemotherapy : this procedure recapitulates the Stupp protocol proposed to GBM patients following surgical resection. this step includes 5 treatments of 25 mg/kg of TMZ for 3 days following the surgical procedure, supplemented with 5 times 2 Gy of radiotherapy. Animals were then subjected to the standard procedure



of chemotherapy, namely 30-50 mg/kg of TMZ on 5 days with 2 or 3 days of rest between each treatment.

*Immunohistochemistry* - The immunochemistry experiments were performed on 5 µm tumor sections which were incubated at room temperature for 1 hour with primary antibodies. Immunostaining was performed using BenchMarkXT-Ventana Medical Systems with kit OMNIMAP (system “biotin-free” using multimer technology) with antigen retrieval for all (Tris/borate/EDTA pH 8). To perform the analysis, glass slides were converted on to digital slides with the scanner Nanozoomer 2.0-RS Hamamatsu.

*Manufacturing of the gel implant containing the IRE1 RNase inhibitor MKC8866 and cell-based testing* - Human fibrinogen was dissolved in deionized water at a concentration of 30 mg/ml followed by dialysis against tris-buffered saline (TBS) overnight. MKC8866 was resuspended in the fibrinogen component of fibrin microgels at a final concentration of 10 and 100 µM. The gel-forming fraction containing MKC8866 was then dispensed as 7 µl droplets on a hydrophobic surface (commercial Teflon® tape) to create a micro-droplet. The gel fractions were then crosslinked by human thrombin (40 U/ml) and incubated for 20 minutes at 37 °C for stable cross-linking. To test the gel in vitro, U251 cells were seeded in 12-well plates at 10,000 cells/well or 20,000 cells/well. After 24h, the cells were cultivated in the absence (no gel) or presence of fibrin microgel containing different concentrations of MKC8866 (0 to 100 µM). After seven days, the cells were treated for 5h with tunicamycin at 5 µg/mL to activate IRE1 pathway and XBP1 RNA splicing. They were then lysed using 0.5 ml of Trizol reagent per well and RNA was extracted according to the manufacturer's instructions (Thermo Fisher Scientific). PCR was performed for total XBP1 splicing, and the resulting amplified DNA products were resolved using a 4% agarose gel. The upper band (unspliced XBP1) and lower band (spliced XBP1) were then quantified using the ImageJ software and the ratio between the unspliced (U) and spliced (S) forms of XBP1 were calculated by the following formula:  $S/(U+S) * 100$ . For in vivo studies, gel implantation was carried out at the moment of the surgery. Briefly preformed microgels were deposited in the resection cavity prior to implanting a teflon plate and sewing the skin.

## Results

### *Genetic alterations of the GBM cell line GL261 used in the mouse model*

In this study, we aim to develop a novel syngeneic mouse model that recapitulates the human standard of care to treat GBM disease. The GL261 cell line was selected as a model for these experiments following the analysis of their genome. As few information was available on the genetic alterations bearing by GL261 cells, we first focused on 86 GBM related genes (including variants, **Tables S1-S3**), including 79 genes recently reported [13], and 7 additional genes (two Stupp protocol response predictors *Mgmt* and *Dgki*; the canonical Endoplasmic Reticulum stress sensors *Eif2ak3* (*Perk*), *Atf6* and *Ern1* (*Ire1*); the genes *Pi3k* and *Tert* frequently mutated in IDH-wild type GBM). We found that 17 genes were harboring one or more mutations with a predicted functional impact (**Table 1**). Some of those mutated genes are known oncogenes (*Kras*, *Met*, *Pi3kca*) or tumor suppressor genes (*Nf1* and *Trp53*). Cancer genes were also affected by DNA gains (*Egfr*, *Mdm2*, *Pdgfra* for instance) or losses (*Cdkn2c* and *Pten*). RNAseq of the parental GL261 cells further indicated that oncogenic mutations were also present and sometimes enriched at the mRNA level in those cells (*Kras*, *Nf1*, *Pik3ca* and *Trp53* for instance, **Table 1**, **Figure 1**, **Tables S1-S3**). These results showed that GL261 cells express known GBM cancer driver genes and therefore represent a suitable cell line for the development of a syngeneic *in vivo* model.

### *Novel preclinical GBM mouse model including surgery, irradiation and chemotherapy*

Due to lack of a murine preclinical model recapitulating GBM patients' handling, we sought to develop a novel model that would comprise surgical resection combined with radio/chemotherapy, comparable to the clinical setup (**Figure 2A**, human vs. mouse). We designed an experimental approach relying on the mouse GBM line GL261 that we modified for stable expression of luciferase in order to allow live tumor imaging. These cells were then orthotopically injected in C57BL/6 mouse brain and tumors allowed to grow for 12 to 13 days. At this stage, tumors were surgically resected using fluorescein as a tumor tracer (**Movie S1**) and the mice were allowed to recover from surgery for 1 week before undergoing Stupp-like treatment (**Figure 2B**). The Stupp-like protocol included radiation (2 Gy/day, 5 exposures) combined with chemotherapy (TMZ, 25 mg/kg, 5 applications) and followed by TMZ treatment alone (30-50 mg/g, 5 applications followed by 2 days without treatment for 4 weeks).

Following the completion of Stupp-like procedure, described in **Figure 2**, mice were sacrificed at first clinical signs. Brains were collected, fixed in paraformaldehyde (PFA 4%), embedded in paraffin prior to immunohistochemical analysis using anti-vimentin antibodies. This revealed the impact of surgery on tumor size and aggressiveness (**Figure 3A**), as well as the effects of irradiation/TMZ treatment, which appeared to reduce tumor size and ability to infiltrate surrounding parenchyma (**Figure 3A**, SIT). Mouse survival was then evaluated upon these treatments (**Figure 3B**), and showed that while surgery did not have any significant impact, Stupp-like treatment doubled mouse survival, thereby recapitulating observations made in patients following this protocol. Moreover, we analyzed the impact of surgery on tumor angiogenesis by staining the recurring tumor sections with anti-CD31 antibodies (**Figure 3C**). Quantitation of the staining revealed that there was no significant difference in blood vessel density between the non-resected and resected conditions (**Figure 3D**), but more work should be carried out to provide an in depth analysis of the nature of the blood vessels analyzed in both conditions. Furthermore, we analyzed the ability of tumor cells to invade the neighboring parenchyma in primary or post-surgery recurring tumors by analyzing the vimentin staining (**Figure 3E**). Quantitation of this staining revealed that surgical resection of tumors enhanced the capacity of tumor cells to infiltrate non-tumor tissue (**Figure 3F**).

#### *Impact of IRE1 RNase inhibitor MKC8866 in vitro and in vivo*

Once this model was established, we evaluated the impact of pharmacological IRE1 inhibition on the parameters mentioned above. However, a major hurdle in that process resided in the fact that MKC8866, an IRE1 inhibitor previously demonstrated to impact tumor growth in other cancer models [10] does not pass the blood brain barrier (BBB) and as such would not be suitable for intervention in brain tumors. To overcome this problem, we reasoned that we could take advantage of the surgical resection step for selective intra-operative delivery of IRE1-targeting drugs, provided that proper biomaterial scaffolds would be used to allow controlled release of the drugs to the tumor. The procedure was successfully set in place using two kinds of biomaterials including a drug containing fibrin microgel (conceived at NUI Galway) or a collagen sponge (Pangen) soaked in drug solutions (IRE1 RNase inhibitor MKC8866) at the appropriate concentrations (**Figure S1**). We followed up by evaluating how the implantation of these drug containing devices impacted on tumor

development (without Stupp-like treatment). Mouse survival was evaluated post implantation and revealed that local IRE1 inhibition did not significantly (neither positively nor negatively) modify mouse survival following resection (**Figure S1**). As we initially showed that IRE1 signaling and more particularly the IRE1/XBP1s axis contributed to the remodeling of the tumor stroma, we then sought to evaluate how the intra-operative application of the IRE1 RNase inhibitor impacted on tumor characteristics. To this end, we first evaluated tumor structures at sacrifice using H&E staining (**Figure S1B**). This showed that although the fibrin microgels appeared to exhibit a controlled tumor development (compared to non-resected tumors), implantation of the Pangen sponges did not modify (rather amplified) tumor development. The H&E analysis did not allow the characterization of other tumor properties. Collectively, implantation of the devices containing the IRE1 inhibitor did not modify mouse survival compared to surgery alone (**Figure S1C**). Following these observations, we decided to abandon the “sponge” approach as it was estimated very toxic. Moreover, the Pangen sponge was outperformed by the fibrin/collagen microgels regarding specific controlled release of the drug. As a consequence, we have since focused only on the fibrin/collagen gels and kept working with MKC8866 as this compound produced minimal toxicity (not shown).

To further document the impact of MKC8866-mediated inhibitory effects on GL261 cells, we performed *in vitro* experiments on these cells. We first evaluated whether MKC8866 blocked ER stress induced by tunicamycin (TUN, an inhibitor of protein N-glycosylation and inducer of ER stress); and then we evaluated the stress induced upon TMZ treatment. As expected MKC8866 treatment impaired TUN-induced IRE1 signals (**Figure 4A**), did not affect TUN-induced ATF4 expression (**Figure 4B**, top panel), but unexpectedly affected TMZ-induced ATF4 expression (**Figure 4B**, bottom panel). The activation of three UPR branches IRE1, PERK and ATF6 also appeared to be altered in response to TMZ (**Figure 4C, D**). Finally, since treatment of GL261 cells with MKC8866 appeared to impact on the response of these cells to different stressors, we evaluated the impact IRE1 RNase inhibition on cell sensitivity to TMZ. To do so, TMZ IC50 was determined for GL261 and evaluated to range to 800  $\mu$ M (**Figure 4E**), and did not vary upon combined radiation. Remarkably, GL261 cells' sensitivity to TMZ was increased upon treatment with MKC8866, phenomenon further amplified with combined irradiation (**Figure 4E**). These results suggest that TMZ-induced damages to the cells promote the activation of IRE1 dependent adaptive signals that if

blocked by MKC8866, decrease the cell ability to cope with TMZ treatment. Consequently, these data suggest that combining Stupp treatment with MKC8866 might be an interesting approach to enhance treatment efficacy.

To test this hypothesis, we evaluated the combination of MKC8866 with Stupp-like treatment using the fibrin-collagen gel plug as delivery tool. Surgery and drug implant were carried out and the first line of treatment including radiation/chemotherapy was done in the previous series of experiments (**Figure 5A**). Mouse survival was evaluated and brains were collected as sacrifice. In the first instance we evaluated the impact of MKC8866, Stupp-like treatment and combined therapy on tumor morphology at sacrifice. The new plugs of 2 mm<sup>3</sup> were appropriate in terms of size and conformation, they adjusted perfectly to the resection cavity. Our latest results show that tumors developing in the presence of the MKC8866 containing plug and upon Stupp treatment present a totally different phenotype from those developing under Stupp treatment alone. This phenotype corresponds to much smaller tumors with tumor escape significantly delayed (**Figure 5B**). Furthermore, when necrosis was measured in tumors collected at sacrifice (H&E staining), we observed that the combination of Stupp treatment and MKC8866 yielded much important necrosis, reflecting treatment efficacy (**Figure 5C**). At last, we tested whether combined MKC8866 and Stupp treatment impacted on mouse survival. This allowed us to establish survival curves (**Figure 5D**) that demonstrate the positive impact of MKC8866 contained fibrin/collagen graft (1-2 µl) either at a 10 µM (**Figure 5D**, green) or 100 µM (**Figure 5D**, orange) concentration on the efficiency of Stupp treatment. We found that MKC8866 yielded a significant increase of mice survival (of about 20%) compared to Stupp alone however with no significant impact of the drug concentration used in the gel (**Figure 5D**) whereas it was observable in cell culture (**Figure S2**). This suggested that the main limitation in our experimental design was the capacity of the fibrin/collagen gel to control the delivery of the drug over time. Collectively, our results show that IRE1 RNase inhibition might represent an appealing approach to enhance the efficiency of current treatments towards GBM and that further work is needed to improve drug delivery to the tumor site.

## Discussion

Herein, we established a novel murine preclinical model of GBM that recapitulates standard therapy for human patients. This model includes surgical resection of the tumor and Stupp-like treatment combining irradiation and TMZ-based chemotherapy. Our model relies on the use of GL261 cells that exhibit a genome harboring the majority, if not all mutations, driving the glioblastomagenesis. These mutations and/or copy number variations were observed in genes involved in the 3 main pathways affected in GBM (the receptor tyrosine kinase (RTK), P53, RB1 pathways, **Figure 1** [14]). Furthermore, GBM related genes, harboring one SNV in GL261 and two DNA copies (**Tables S1-S3**) had variable mutation allele frequency (MAF) values ranking between 6 and 100%. This MAF distribution strongly suggests that multiple different clones compose the parental GL261 line (up to 5). Altogether these GL261 characteristics recapitulate molecular features observed for primary GBM at diagnostic with the presence of multiple drivers and/or multiple GBM clones [2]. Therefore, this cell line very likely constitutes a valuable GBM model for preclinical studies in mice.

The use of such model in the context of our discovery regarding the role of IRE1 signaling in GBM [15] has allowed us to test the impact of IRE1 pharmacological inhibition in enhancing the efficacy of Stupp treatment as already demonstrated in other contexts, for instance for the sensitization of Triple Negative Breast Cancers (TNBC) to paclitaxel therapy [10, 16]. In contrast with the approaches carried out with TNBC which included systemic injection of MKC8866 [10, 16], the available pharmacological inhibitors did not pass the blood brain barrier and as such we had to design a novel type of therapeutic strategy which would allow the controlled release of the drug during Stupp treatments. As such, we took advantage of the surgical step to use the peri-surgical implantation of a biocompatible graft containing the drug (**Figure S1**). This was achieved by using a fibrin/collagen graft (1-2  $\mu$ l) containing 10  $\mu$ M (**Figure 5D**, green) or 100  $\mu$ M (**Figure 5D**, orange) of MKC8866, corresponding to non-toxic concentrations in cell culture and in animals. The grafts were implanted at the time of surgery and mice were then exposed to Stupp-like treatments. Both macroscopic exploration, immunohistochemistry and Kaplan-Meier survival curves (**Figure 5**) indicated that combination of MKC8866 with Stupp treatment enhanced its efficacy, leading to increased necrosis within the tumor and to prolonged mouse survival.

Collectively, our work provides the proof of concept that the pharmacological inhibition of IRE1 could be used as an adjuvant to enhance the efficacy of combined

radiation and chemotherapy in the context of GBM. However, one still must evaluate the impact of these treatments on the characteristics of the recurrent tumors regarding their treatment resistance properties and also whether some specific cohorts of GBM patients (e.g., depending on their IRE1 signaling characteristics) would derive more benefit and should be preferentially targeted.

## Acknowledgements

We thank the BIOSIT H2P2 platform and Florence Jouan for immunohistochemistry and the BIOSIT Animal facility ARCHE (<https://biosit.univ-rennes1.fr/>). This work was funded by grants from the French National Cancer Institute (INCa, PLBIO), the Fondation pour la recherche Médicale (FRM ; équipe labellisée 2018) to EC and EU H2020 MSCA ITN-675448 (TRAINERS) and MSCA RISE-734749 (INSPIRED) grants to AS and EC. The work was also supported in part by research grant from Science Foundation Ireland (SFI), co-funded under the European Regional Development Fund under Grant number 13/RC/2073.

## Authors' contributions

**Conceptualization** – PJLR, RP, EC; **Data curation** – MA, NS, AE, JM; **Formal analysis** – MA, NS; **Funding acquisition** – EC, AP, AS, AG; **Investigation** – PJLR, RP, GJ, SL, MA, NS, AE, JM, TA; **Methodology** – PJLR, RP, EC; **Project administration** – PJLR, RP, TA, EC; **Resources** – JS, AP, JBP, QZ; **Supervision** – EC; **Validation** – PJLR, RP, EC; **Visualization** – PJLR, RP, GJ, SL, MA, NS, AE, JM, EC; **Writing – original draft** – EC; **Writing – review & editing** – PJLR, RP, SL, AG, AS, MA, NS, AE, JM, TA, EC

## Conflicts of interest

EC, AS, AG are founding members of Cell Stress Discoveries ltd (<https://cellstressdiscoveries.com/>)



# References

1. Stupp, R., et al., *Radiotherapy plus concomitant and adjuvant temozolomide for glioblastoma*. The New England journal of medicine, 2005. **352**: p. 987-96.
2. Körber, V., et al., *Evolutionary Trajectories of IDHWT Glioblastomas Reveal a Common Path of Early Tumorigenesis Instigated Years ahead of Initial Diagnosis*. Cancer Cell. . 2019. **35**(4): p. 692-704.
3. Drogat, B., et al., *IRE1 signaling is essential for ischemia-induced vascular endothelial growth factor-A expression and contributes to angiogenesis and tumor growth in vivo*. Cancer Res, 2007. **67**(14): p. 6700-7.
4. Auf, G., et al., *Inositol-requiring enzyme 1alpha is a key regulator of angiogenesis and invasion in malignant glioma*. Proc Natl Acad Sci U S A, 2010. **107**(35): p. 15553-8.
5. Dejeans, N., et al., *Autocrine control of glioma cells adhesion and migration through IRE1alpha-mediated cleavage of SPARC mRNA*. J Cell Sci, 2012. **125**(Pt 18): p. 4278-87.
6. Pluquet, O., et al., *Posttranscriptional regulation of PER1 underlies the oncogenic function of IREalpha*. Cancer Res, 2013. **73**(15): p. 4732-43.
7. Obacz, J., et al., *Endoplasmic reticulum proteostasis in glioblastoma-From molecular mechanisms to therapeutic perspectives*. Sci Signal, 2017. **10**(470).
8. Lhomond, S., et al., *Dual IRE1 RNase functions dictate glioblastoma tumor development*. Embo Mol Med, 2018. **In press**.
9. Volkmann, K., et al., *Potent and selective inhibitors of the inositol-requiring enzyme 1 endoribonuclease*. J Biol Chem, 2011. **286**(14): p. 12743-55.
10. Logue, S.E., et al., *Inhibition of IRE1 RNase activity modulates the tumor cell secretome and enhances response to chemotherapy*. Nat Commun, 2018. **9**(1): p. 3267.
11. Sicari, D., et al., *A guide to assessing endoplasmic reticulum homeostasis and stress in mammalian systems*. FEBS J, 2019. doi: **10.1111/febs.15107**.
12. Denham, J.W. and M. Hauer-Jensen, *The radiotherapeutic injury--a complex 'wound'*. Radiother Oncol., 2002. **63**(2): p. 129-45.
13. Lee, J.H., et al., *Human glioblastoma arises from subventricular zone cells with low-level driver mutations*. Nature, 2018. **560**(7717): p. 243-247.
14. Brennan, C.W., et al., *The somatic genomic landscape of glioblastoma*. Cell, 2013. **155**(2): p. 462-77.
15. Obacz, J., et al., *Endoplasmic reticulum proteostasis in glioblastoma – from molecular mechanisms to therapeutic perspectives*. Sci. Signal, 2017. **In press**.
16. Zhao, N., et al., *Pharmacological targeting of MYC-regulated IRE1/XBP1 pathway suppresses MYC-driven breast cancer*. J Clin Invest, 2018. **128**(4): p. 1283-1299.

**Table 1: GBM related genes harboring one or more mutations with a predicted functional impact using Ensembl Variant Effect Predictor.** Csq: predicted effect that the allele of the variant may have on the transcript. IMPACT: a subjective classification of the severity of the variant consequence, based on agreement with SNPEff (HIGH/MODERATE/LOW).

| Gene    | Chr | POS       | Exon | Wild/Mut | Csq          | IMPACT   | SIFT        | Grantham | WGS depth | WGS MAF | Protein V | RNAseqDepth | RNAseq MAF | Pathway                      |
|---------|-----|-----------|------|----------|--------------|----------|-------------|----------|-----------|---------|-----------|-------------|------------|------------------------------|
| Arid1a  | 4   | 133681286 | 20   | tGt/tAt  | missense V   | MODERATE | .           | 194:R    | 20        | 30      | C1966Y    | 130         | 45 %       | SWI/SNF chromatin remodeling |
| Arid1b  | 17  | 4995695   | 1    | Ggc/Tgc  | missense V   | MODERATE | .           | 159:R    | 23        | 30      | G201C     | 4           | 0 %        | SWI/SNF chromatin remodeling |
| Card6   | 15  | 5099251   | 4    | Gca/Cca  | missense V   | MODERATE | deleterious | 27:C     | 68        | 16      | A888P     | 41          | 7 %        | apoptosis/NF-kB              |
| Gabra6  | 11  | 42320453  | 2    | Gaa/Taa  | stop         | HIGH     | .           | 250      | 33        | 27      | E30       | 0           | 0 %        | --                           |
| Gpx5    | 13  | 21287385  | 5    | aGc/aCc  | missense V   | MODERATE | deleterious | 58:MC    | 30        | 47      | S216T     | 0           | 0 %        | --                           |
| Il18rap | 1   | 40524376  | 4    | Cat/Aat  | missense V   | MODERATE | tolerated   | 68:MC    | 10        | 7       | H22N      | 0           | 0 %        | immune response/NF-kB        |
| Kras    | 6   | 145246772 | 2    | Ggt/Tgt  | missense V   | MODERATE | deleterious | 159:R    | 36        | 100     | G12C      | 142         | 100 %      | RTK/MAPK                     |
| Met     | 6   | 17491881  | 3    | tCg/tTg  | missense V   | MODERATE | deleterious | 145:MR   | 8         | 6       | S214L     | 48          | 2 %        | RTK                          |
| Mgmt    | 7   | 137127888 | 5    | Ccc/Acc  | missense V   | MODERATE | deleterious | 38:C     | 20        | 15      | P144T     | 0           | 0 %        | DNA repair                   |
| Mmp13   | 9   | 7272774   | 2    | Aaa/Caa  | missense V   | MODERATE | tolerated   | 53:MC    | 40        | 70      | K45Q      | 0           | 0 %        | infiltration/ECM degradation |
| Nf1     | 11  | 79471575  | 34   | aGt/aTt  | missense V   | MODERATE | deleterious | 142:R    | 45        | 29      | S1526I    | 27          | 70 %       | RTK/MAPK                     |
| Nf1     | 11  | 79546350  | 41   | Gag/Tag  | stop         | HIGH     | .           | 250      | 12        | 8       | E203I     | 34          | 44 %       | RTK/MAPK                     |
| Nlrp5   | 7   | 23418216  | 7    | tcG/tc   | frameshift V | HIGH     | .           | .        | 31        | 58      | S455X     | 0           | 0 %        | --                           |
| Pik3ca  | 3   | 32439942  | 4    | aTt/aCt  | missense V   | MODERATE | tolerated   | 89:MC    | 39        | 46      | I351T     | 55          | 31 %       | RTK/AKT                      |
| Rfx6    | 10  | 51693701  | 5    | cAt/cGt  | missense V   | MODERATE | deleterious | 29:C     | 41        | 100     | H190R     | 0           | 0 %        | --                           |
| Rfx6    | 10  | 51715912  | 11   | Ttt/Att  | missense V   | MODERATE | deleterious | 21:C     | 28        | 50      | F348I     | 0           | 0 %        | --                           |
| Scn9a   | 2   | 66487583  | 26   | atG/atT  | missense V   | MODERATE | tolerated   | 10:C     | 27        | 26      | M1509I    | 0           | 0 %        | Na+ channel                  |
| Scn9a   | 2   | 66566238  | 3    | Cct/Act  | missense V   | MODERATE | tolerated   | 38:C     | 30        | 73      | P104T     | 0           | 0 %        | Na+ channel                  |
| Sema3e  | 5   | 14236370  | 14   | cCg/cAg  | missense V   | MODERATE | deleterious | 76:MC    | 18        | 67      | P535Q     | 27          | 93 %       | angiogenesis                 |
| Trp53   | 11  | 69588455  | 5    | cGt/cCt  | missense V   | MODERATE | tolerated   | 103:MR   | 23        | 100     | R153P     | 367         | 100 %      | p53                          |

## Legends to Figures

**Figure 1: Genetic alterations found in the GL261 line genome for the involved in the three critical GBM signaling pathways RTK, P53 and RB.** Sequence mutations and copy number changes are depicted as grey boxes for mutations, red boxes for gain of DNA copy and blue boxes for loss of DNA copy. Mutation allele frequency in the gene and the transcript (in parentheses) or DNA copy number are indicated under the corresponding gene name.

**Figure 2: Preclinical development of a novel GBM model in immunocompetent mice.** This model comprises surgical resection followed by radio/chemotherapy that recapitulates the current GBM patient standard of care (Stupp protocol) in mice. **A)** Schematic representation of the experimental design and comparison between human and the mouse model. **B)** Schematic representation of the mouse model with the 3 major steps including “Injection” of cells (orthotopic) and fluorescein 14 days later; “Resection” of tumors. The skull was removed and the tumor contour was defined after injecting fluorescein and applying UV source on the tumor site. After aspiration of the tumor material, the resection cavity was filled with hemostatic materials before implanting a teflon prosthesis (replacing the removed bone) and the skin sewn; and “treatment” combining irradiation and chemotherapy (temozolomide/TMZ) – the surgical procedure is also reported in Movie S1.

**Figure 3: Development and analysis of the establishment of a Stupp-like protocol in mice.** **A)** At sacrifice, brains were collected, fixed in PFA, embedded in paraffin prior to be analyzed using immunohistochemistry using anti-vimentin antibodies (CTR: no injection; NS: no surgery; S: surgery only; SIT:surgery/irradiation/TMZ). **B)** Kaplan-Meier representation of mouse survival under this regiment (green: non-resected, blue: surgical resection, orange: surgical resection + radio/chemotherapy). **C-D)** Immunohistochemical analysis and quantitation of tumor angiogenesis post-resection. **E-F)** Immunohistochemical analysis and quantitation of tumor infiltration/invasion post-resection.

**Figure 4: Evaluation of the impact of IRE1 inhibition by MKC8866 on GL261 response to stress.** **A)** Impact of MKC8866 treatment on IRE1 signaling as monitored using RT-qPCR analysis of XBP1 mRNA splicing and expression of XBP1s target gene *Erdj4*, induced by tunicamycin. **B)** Impact of MKC8866 on TUN- and TMZ-induced Atf4 expression and the

phosphorylation of eIF2 $\alpha$  as monitored using Western blot. **C)** Impact of MKC8866 treatment on IRE1 signaling induced by TMZ as monitored using RT-qPCR analysis of XBP1 mRNA splicing and expression of XBP1s target gene *Erdj4*. **D)** Impact of MKC8866 treatment on ER stress signaling induced by TMZ as monitored using RT-qPCR analysis of HERPUD1, GRP94 and CHOP mRNA expression. **E)** Impact of MKC8866 treatment on the sensitivity of GL261 cells to TMZ treatment in the presence or absence of radiation.

**Figure 5: Impact of IRE1 inhibition on tumor development under Stupp treatment. A)** Schematic representation of the experimental procedure and mouse survival. **B)** Macroscopic images of the brains following injection of GL261-Luc cells, surgical resection and treatment with ctrl plug (blue), MKC8866-containing fibrin microgels (grey); ctrl plug + Stupp (red) and MKC8866-containing fibrin microgels + Stupp (green). **C)** Quantification of tumor necrosis upon different treatments. **D)** Impact of IRE1 inhibition on tumor development under Stupp treatment - Kaplan-Meier representation. p value between Stupp and Stupp+MKC8866 (0.0146 - 10 $\mu$ M and 0.0118 - 100 $\mu$ M).

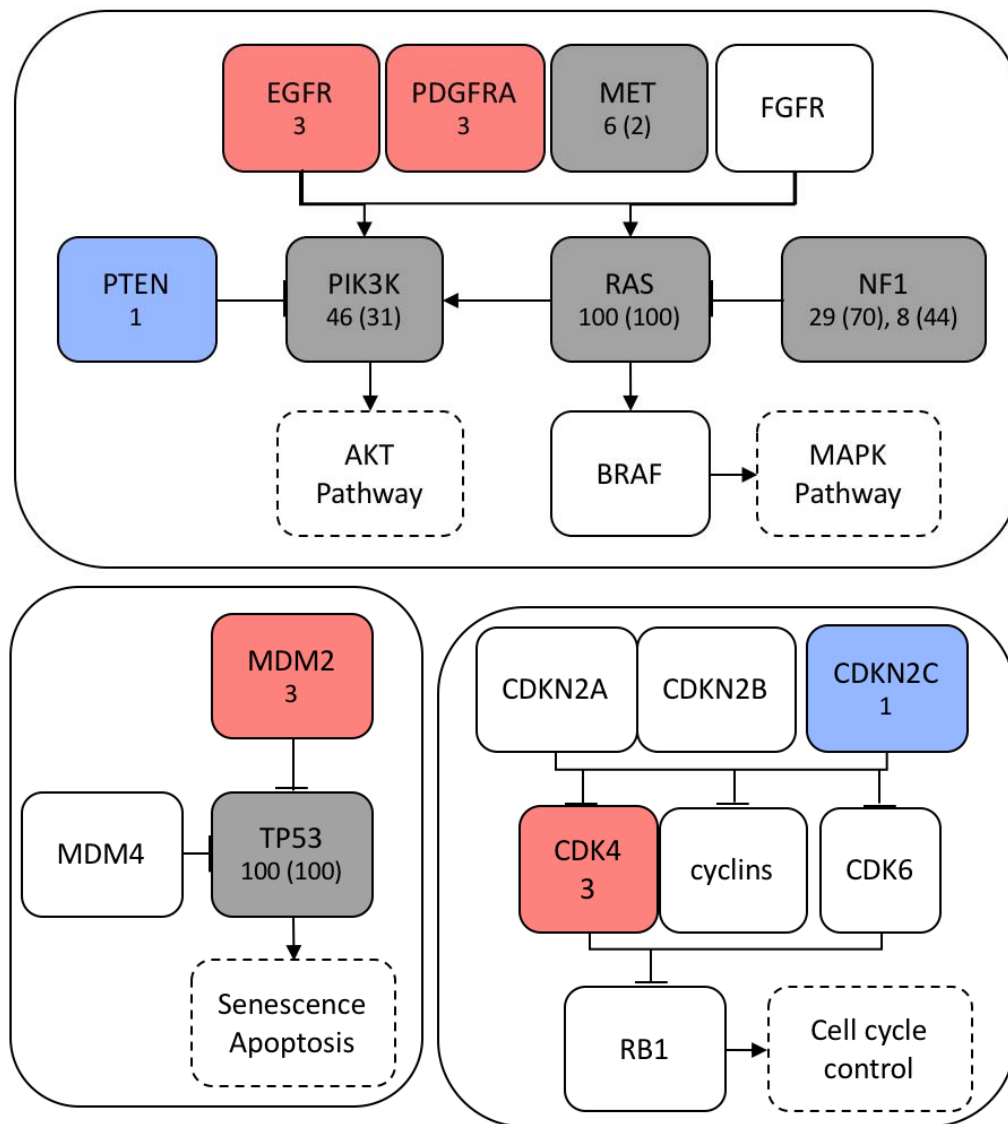

FIGURE 1

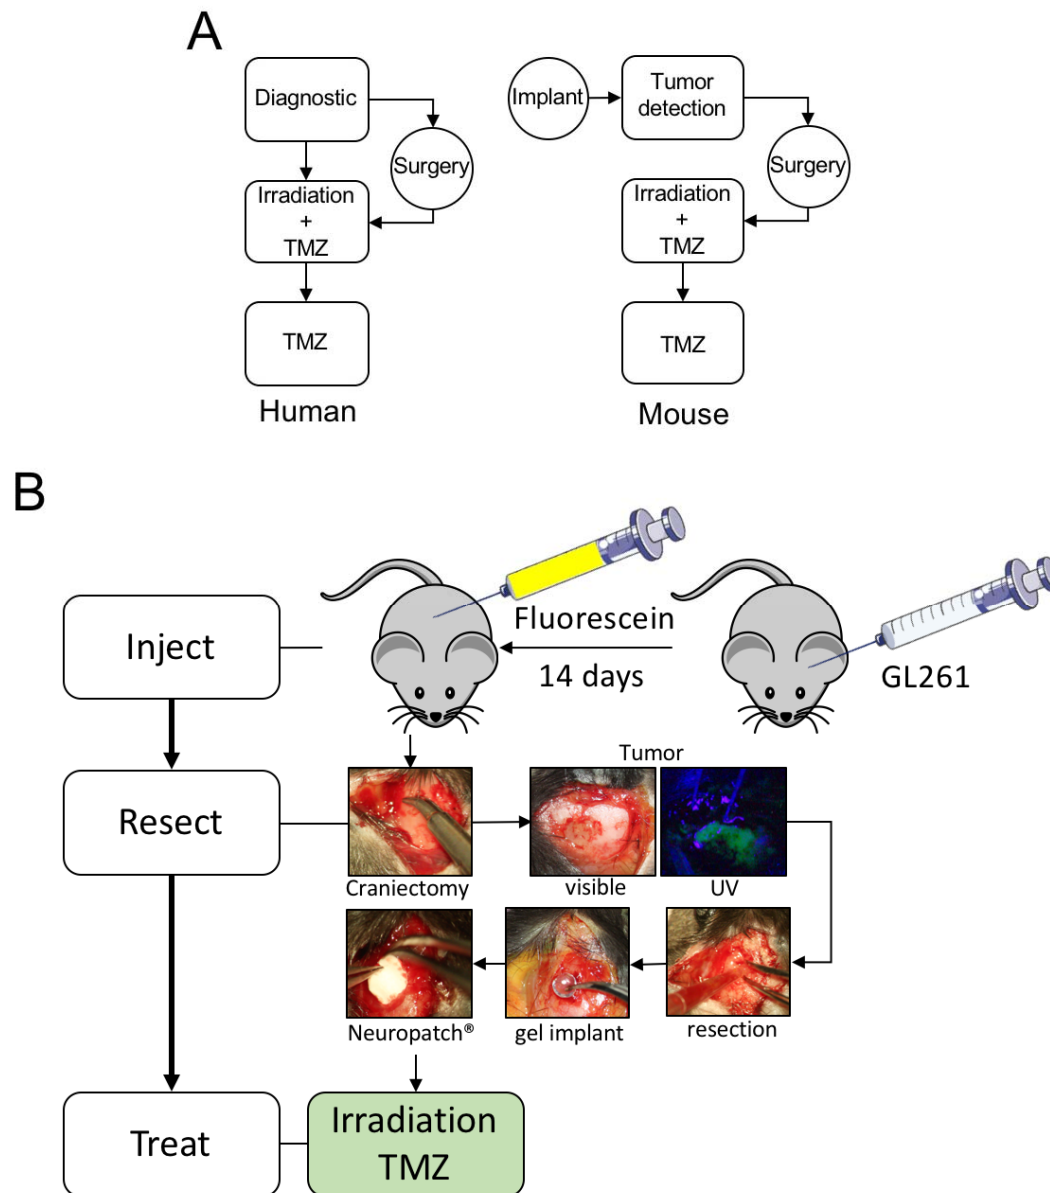

FIGURE 2

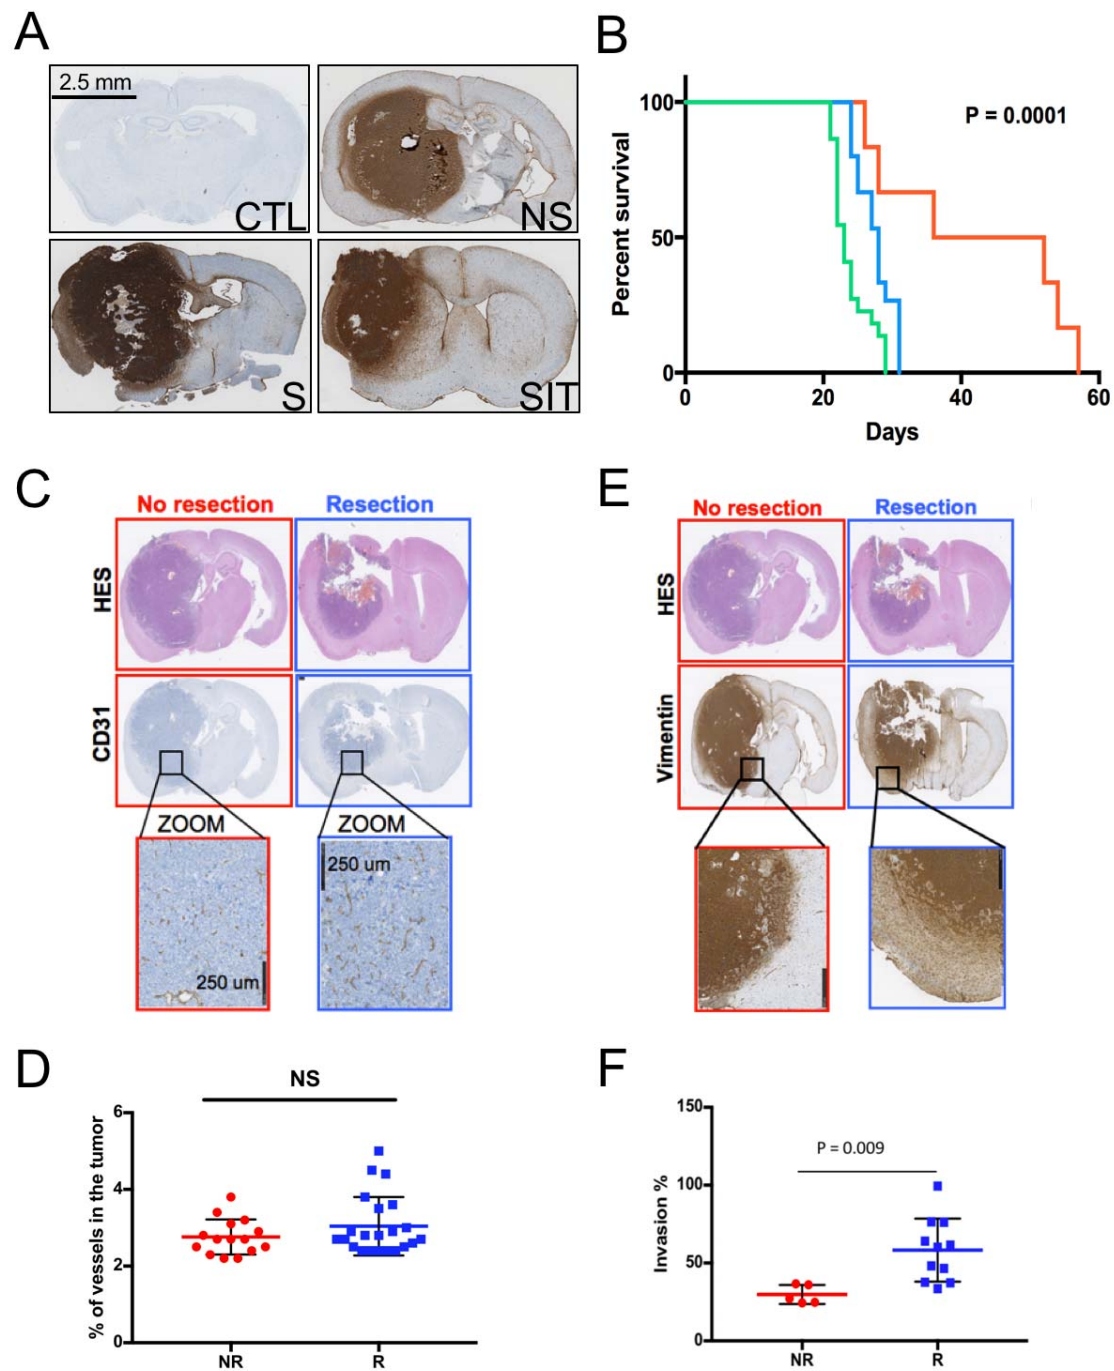

FIGURE 3

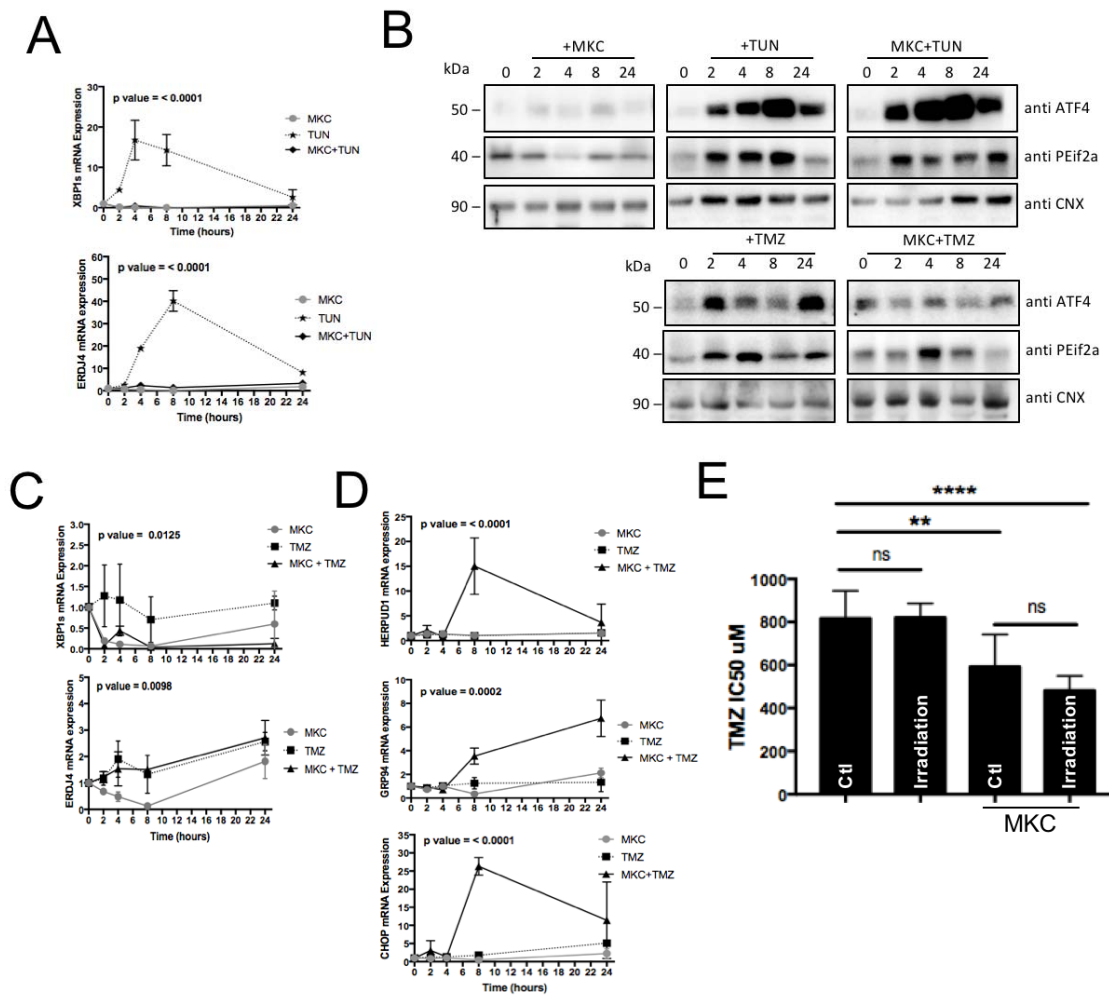

FIGURE 4



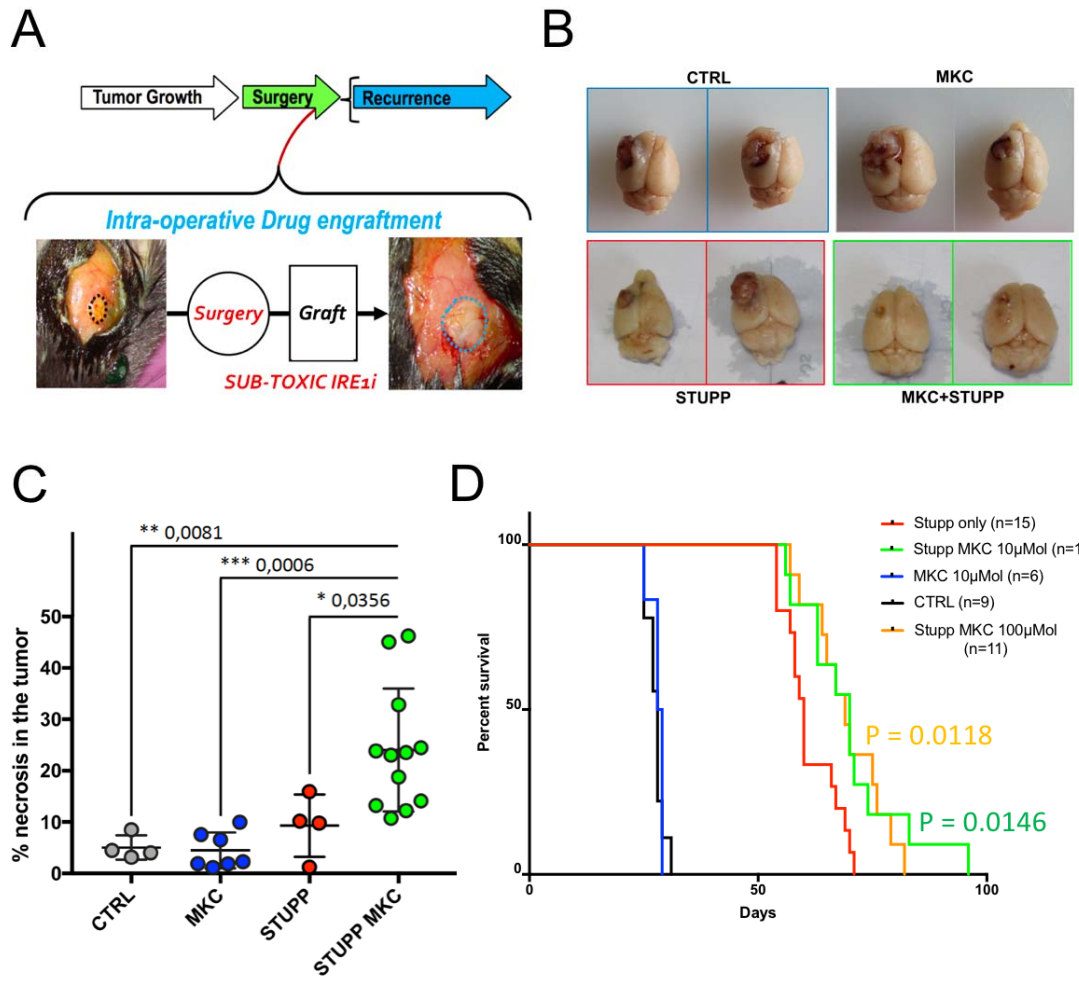

FIGURE 5
